# Supplementary material for: Knockdown of PC4 Increases Chemosensitivity of Oxaliplatin in Triple Negative Breast Cancer by Supressing mTOR Pathway
Source: Research Square preprint supplement (doi:10.21203/rs.3.rs-101235/v1), 2020-11-10
Supplement: Supplementary file 1 [file 0ef0ac169904bb9479d80d9b.docx]

**Supplementary Table 1. Sequences of the shRNA**

| **Gene** | **shPC4-1** | **shPC4-2** | **negative control shRNA** |
| --- | --- | --- | --- |
| PC4 | 5’-GACAGGUGAGACUUCGAGATT -3’; 5’- UCUCGAAGUCUCACCUGUCTT -3’ | 5’- ACAGAGCAGCAGCAGCAGATT -3’;  5’-UCUGCUGCUGCUGCUCUGUTT-3’ | 5’-UUCUCCGAACGUGUCACGUTT-3’; 5’-ACGUGACACGUUCGGAGAATT-3’ |

**Supplementary Table 2. Sequences of** **the utilized primer sequence for real-time qPCR**

| **Gene** | **Forward sequences** | **Reverse sequences** |
| --- | --- | --- |
| β-actin | 5- GCCGACAGGATGCAGAAGG -3 | 5- TGGAAGGTGGACAGCGAGG -3 |
| PC4 | 5- ATGTCAGTGTTCGGGACTTCA -3 | 5- ACAGCTTTCTTACTGCGTCATC -3 |

**Supplementary Table 3. Reagents and resource**

| **REAGENT or RESOURCE** | **SOURCE** | **Cat#** |
| --- | --- | --- |
| **Cell lines** |  |  |
| MDA-MB-453 | ATCC | HTB-131,  RRID: CVCL_0418 |
| MDA-MB-231 | ATCC | HTB-26MET,  RRID: CVCL_VR67 |
| MDA-MB-361 | ATCC | HTB-27,  RRID: CVCL_0620 |
| SR-BR-3 | ATCC | HTB30,  RRID: CVCL_0033 |
| **Antibodies** |  |  |
| PC4 | Abcam | ab154852  RRID:NA |
| mTOR | Abcam | ab2732   RRID: AB_303257 |
| Poly ADP-ribose Polymerase (PARP) | Abcam | ab74290  RRID: AB_1281059 |
| Cleaved caspase 9 | Abcam | ab2324  RRID: AB_302981 |
| Phospho-mTOR(p-mTOR) | CST | 5536t  RRID:NA |
| Phospho-Eukaryotic Translation Initiation Factor 4E-Binding Protein 1 (p-4EBP1) | CST | 2855t  RRID:NA |
| Total Eukaryotic Translation Initiation Factor 4E-Binding Protein 1 (t-4EBP1) | proteintech | 60246-1-Ig  RRID:NA |
| Phospho-S6 Ribosomal Protein(p-S6RP) | Cell Signaling Technology | 5364  RRID: AB_10694233 |
| β-actin | Cell Signaling Technology | 4970  RRID: AB_2223172 |
